# Supplementary material
Source: Elsevier journal article supplement (https://www.sciencedirect.com/science/article/pii/S0300893216304420)
Supplement: mmc1 [file mmc1.pdf]

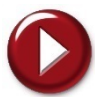

## Material suplementario

# Implante percutáneo de válvula aórtica en pacientes con prótesis mitral previa. Revisión sistemática

### Table of the supplementary material

Summary of Patients With Transcatheter Aortic Valve Implantation and Previous Mitral Prostheses Resulting From The Systematic Review of the Literature

| N. | 1st author    | Reference                             | Type of TAVI | Age (years) | Score STS (%) | Time since MMP (years) | Model MMP       | Complications |
|----|---------------|---------------------------------------|--------------|-------------|---------------|------------------------|-----------------|---------------|
| 1  | Rodes-Cabau J | Circ Cardiovasc Interv. 2008;1:233.   | E-S          | 67          | 7,5           | 18                     | St. Jude        |               |
| 2  | Bruschi G     | Ann Thorac Surg. 2009;88:e50-2        | CV           | 72          | 34,0          | 22                     | Sorin monodisc  |               |
| 3  | Bruschi G     | Ann Thorac Surg. 2009;88:e50-2        | CV           | 77          | 35,0          | 13                     | Sorin monodisc  |               |
| 4  | Bruschi G     | Ann Thorac Surg. 2009;88:e50-2        | CV           | 60          | 36,0          | 13                     | Sorin monodisc  |               |
| 5  | Bruschi G     | Ann Thorac Surg. 2009;88:e50-2        | CV           | 77          | 37,0          | 11                     | Sorin Bicarbon  |               |
| 6  | Scherner M    | Ann Thorac Surg. 2009;88:1662-3.      | E-S          | 84          | 24,0          | 13                     | -               |               |
| 7  | Kahlert P     | Herz. 2009;34:645-7.                  | CV           | 68          | -             | 19                     | BJörk-Shiley    |               |
| 8  | Dumonteil N   | JACC Cardiovasc Interv. 2009;2:897-8. | E-S          | 82          | 26,5          | 25                     | Lillehei-Kaster |               |
| 9  | Chao V        | J. Invasive Cardiol. 2010;22:39-40.   | E-S          | 72          | 5,3           | 12                     | St. Jude        |               |
| 10 | García E      | Rev Esp Cardiol. 2011;64:1052-5.      | SXT          | 71          | -             | 2                      | ATS             |               |
| 11 | García E      | Rev Esp Cardiol. 2011;64:1052-5.      | SXT          | 83          | -             | 12                     | St. Jude        |               |
| 12 | García E      | Rev Esp Cardiol. 2011;64:1052-5.      | E-S          | 74          | -             | 6                      | St. Jude        |               |
| 13 | Soon JL       | J Am Coll Cardiol. 2011;9:58.         | E-S          | 86          | 18,7          | 13                     | BJörk-Shiley    |               |
| 14 | Soon JL       | J Am Coll Cardiol. 2011;9:58.         | E-S          | 82          | 13,8          | 9                      | St. Jude        |               |
| 15 | Soon JL       | J Am Coll Cardiol. 2011;9:58.         | E-S          | 78          | 5,0           | 13                     | St. Jude        |               |
| 16 | Soon JL       | J Am Coll Cardiol. 2011;9:58.         | E-S          | 67          | 4,6           | 19                     | St. Jude        |               |
| 17 | Soon JL       | J Am Coll Cardiol. 2011;9:58.         | E-S          | 77          | 8,2           | 15                     | St. Jude        |               |
| 18 | Soon JL       | J Am Coll Cardiol. 2011;9:58.         | E-S          | 71          | 4,6           | 12                     | Carbomedics     |               |
| 19 | Soon JL       | J Am Coll Cardiol. 2011;9:58.         | E-S          | 82          | 8,9           | 14                     | St. Jude        |               |
| 20 | Soon JL       | J Am Coll Cardiol. 2011;9:58.         | E-S          | 69          | 10,3          | 4                      | Perimount       |               |

|       |               |                                                |          |            |             |            |                     |                                    |
|-------|---------------|------------------------------------------------|----------|------------|-------------|------------|---------------------|------------------------------------|
| 21    | Soon JL       | J Am Coll Cardiol. 2011;9:58.                  | E-S      | 76         | 15,5        | 8          | Mosaic              |                                    |
| 22    | Soon JL       | J Am Coll Cardiol. 2011;9:58.                  | E-S      | 88         | 9,8         | 10         | Mosaic              |                                    |
| 23    | Drews T       | J Thorac Cardiovasc Surg. 2011;142:84-8.       | E-S      | 82         | 23,0        | 20         | CE Physio ring      | Endocarditis - Death               |
| 24    | Drews T       | J Thorac Cardiovasc Surg. 2011;142:84-8.       | E-S      | 37         | 75,0        |            | St. Jude            | Death at 5th day                   |
| 25    | Drews T       | J Thorac Cardiovasc Surg. 2011;142:84-8.       | E-S      | 75         | 42,0        | 13         | Hancock             |                                    |
| 26    | Drews T       | J Thorac Cardiovasc Surg. 2011;142:84-8.       | E-S      | 80         | 36,0        | 21         | Hancock             |                                    |
| 27    | Drews T       | J Thorac Cardiovasc Surg. 2011;142:84-8.       | E-S      | 82         | 50,0        | 4          | Hancock             |                                    |
| 28    | Drews T       | J Thorac Cardiovasc Surg. 2011;142:84-8.       | E-S      | 85         | 32,0        | 16         | BJörk-Shiley        |                                    |
| 29    | Gedikli O     | J Heart Valve Dis. 2013;22:697-700.            | CV       | 75         | 4,5         | 20         | Starr-Edwards       |                                    |
| 30    | Bruschi G     | Interact Cardiovasc Thorac Surg. 2013;17:90-5. | CV       | 72         | 7,7         | 21         | Sorin monodisc      |                                    |
| 31    | Bruschi G     | Interact Cardiovasc Thorac Surg. 2013;17:90-5. | CV       | 77         | 7,8         | 12         | Sorin monodisc      |                                    |
| 32    | Bruschi G     | Interact Cardiovasc Thorac Surg. 2013;17:90-5. | CV       | 60         | 7,0         | 18         | Sorin monodisc      |                                    |
| 33    | Bruschi G     | Interact Cardiovasc Thorac Surg. 2013;17:90-5. | CV       | 77         | 6,8         | 11         | Sorin Bicarbon      |                                    |
| 34    | Bruschi G     | Interact Cardiovasc Thorac Surg. 2013;17:90-5. | CV       | 74         | 7,9         | 17         | Sorin monodisc      |                                    |
| 35    | Bruschi G     | Interact Cardiovasc Thorac Surg. 2013;17:90-5. | CV       | 31         | 36,8        | 8          | CEP                 |                                    |
| 36    | Bruschi G     | Interact Cardiovasc Thorac Surg. 2013;17:90-5. | CV       | 76         | 6,1         | 6          | CE Physio ring      |                                    |
| 37    | Bruschi G     | Interact Cardiovasc Thorac Surg. 2013;17:90-5. | CV       | 72         | 17,1        | 7          | On-X                | PM implantation                    |
| 38    | Bruschi G     | Interact Cardiovasc Thorac Surg. 2013;17:90-5. | CV       | 83         | 17,5        | 13         | Sorin Bicarbon      |                                    |
| 39    | Testa L       | Catheter Cardiovasc Interv. 2013;82:E621-5.    | CV       | 79         | -           | 21         | Omnicarbon          | Interaction with MMP               |
| 40    | Testa L       | Catheter Cardiovasc Interv. 2013;82: E621-5.   | E-S      | 79         | -           | 21         | Omnicarbon          |                                    |
| 41    | Shamim M      | Heart. 2013;99:217-8.                          | CV       | 75         | -           | 15         | Starr-Edwards       |                                    |
| 42    | Moon S        | Korean Circ J. 2014;44:344-7.                  | CV       | 75         | -           | 26         | St. Jude            |                                    |
| 43    | Minol JP      | J Thorac Cardiovasc Surg. 2014;148:e202-4.     | Engager  | 81         | 5,5         | 4          | St. Jude            |                                    |
| 44    | Latsios G     | Int J Cardiol. 2014;175:e4-5.                  | CV       | 81         | -           | 20         | St. Jude            |                                    |
| 45    | Bagur R       | Ann Thorac Surg. 2015;100:e115-7.              | Accurate | 80         | 9,0         | -          | -                   |                                    |
| 46    | O'Sullivan K  | Catheter Cardiovasc Interv. 2015;85:916-9.     | Jena     | 60         | 6,6         | 10         | Medtronic Hall Disc |                                    |
| 47    | Sarkar K      | Catheter Cardiovasc Interv. 2015;85:920-4.     | CV       | 79         | 11,0        | 10         | Carbomedics         | TAVI embolization                  |
| 48    | Sarkar K      | Catheter Cardiovasc Interv. 2015;85:920-4.     | CV       | 79         | 11,0        | 10         | Carbomedics         | Severe AoR by interaction with MMP |
| 49    | Zacharoulis A | Int J Cardiol. 2015;180:226-7.                 | E-S      | 76         | 22,5        | 10         | -                   |                                    |
| 50    | Zacharoulis A | Int J Cardiol. 2015;180:226-7.                 | E-S      | 70         | 16,4        | 20         | -                   |                                    |
| 51    | Maluenda G    | Cardiovasc Revasc Med. 2016;17:287-9.          | CV       |            |             | 28         | Starr-Edwards       |                                    |
| 52    | Unzué L       | Rev Esp Cardiol. 2013;66:666-8.                | SXT      | 81         | -           | -          | Edwards-Mira        |                                    |
| 53    | Beller CJ     | Heart Surg Forum. 2011;14:E166-70.             | E-S      | 80 (± 5,1) | -           | -          | -                   |                                    |
| 54    | Beller CJ     | Heart Surg Forum. 2011;14:E166-70.             | E-S      | 80 (± 5,1) | -           | -          | -                   |                                    |
| 55    | Beller CJ     | Heart Surg Forum. 2011;14:E166-70.             | E-S      | 80 (± 5,1) | -           | -          | -                   |                                    |
| 56    | Beller CJ     | Heart Surg Forum. 2011;14:E166-70.             | E-S      | 80 (± 5,1) | -           | -          | -                   |                                    |
| 57    | Beller CJ     | Heart Surg Forum. 2011;14:E166-70.             | E-S      | 80 (± 5,1) | -           | -          | -                   |                                    |
| 58-97 | Barbanti M    | J Am Coll Cardiol. 2012;60:1841-2.             | 28 CV,   | 76,3 ± 9,6 | 13,4 ± 11,5 | 15,1 ± 5,5 | -                   | 1 stroke, 11 major                 |

|  |  |  |        |  |  |  |  |                                                        |
|--|--|--|--------|--|--|--|--|--------------------------------------------------------|
|  |  |  | 12 E-S |  |  |  |  | bleeding, 1 re-intervention by AoR and MMP dysfunction |
|--|--|--|--------|--|--|--|--|--------------------------------------------------------|

AoR: aortic regurgitation; CV: CoreValve; E-S: Edwards Sapien; MMP: mechanical mitral prosthesis; PM: pacemaker; STS: *Society of Thoracic Surgeons*; SXT: Sapien-XT;

TAVI: transcatheter aortic valve implantation.
